# Supplementary material for: Enhancing Testing Laboratory Engagement in Plant DNA Barcoding through a Routine Workflow—A Case Study on Chinese Materia Medica (CMM)
Source: MDPI journal article supplement (doi:10.3390/plants11101317), 2022-05-16
Supplement: s1 [file s1]

**Table S1.** Reference DNA sequences selected for the study of CMM.

| <b>CMM</b>                                  | <b>Plant species</b>                | <b>Sequence source</b>                                                                                                       | <b>Major ITS2 haplotype</b>                                                                                                                                                                                                                            | <b>Amplicon (bp)</b> | <b>Variation sites</b>                                                                                                                                                                              | <b>Reference</b> |
|---------------------------------------------|-------------------------------------|------------------------------------------------------------------------------------------------------------------------------|--------------------------------------------------------------------------------------------------------------------------------------------------------------------------------------------------------------------------------------------------------|----------------------|-----------------------------------------------------------------------------------------------------------------------------------------------------------------------------------------------------|------------------|
| <b>Herba<br/>Potentillae<br/>Chinensis</b>  | <i>Potentilla chinensis</i><br>Ser. | 17 CMM collected from 6 locality, 2 plant specimens from 2 locality, 1 NIFDC reference material, 3 counterchecking specimens | CACGTCGTTGCCCCTCCCAACCC<br>CTTCGGGAGTTGGCTGGGACGG<br>ATGATGGCCTCCCGTGTGCTCCG<br>CCGCGCGGTTGGCATAAATAAC<br>GAGTCATCGGCGGCCAACGCCG<br>CGACAATCGGTGGTTGTCAAAC<br>CTCGGTGTCCTGTGCGCGCGCGC<br>GTCGTCTCGGCTCTTCCGATCT<br>AATGCGCGTCGGTTCGCCGGCG<br>CTTTCAACG | 212                  | 22 sites:<br>T26C, T62C, T184C, T195C,<br>A49G, A182G, C64G,<br>C165G, C66T, C69T, C152T,<br>C163T, C171T, C175T,<br>C198T, G91A, G177A,<br>G201A, A96C, C156A,<br>T164G, G193M, in/del 169,<br>174 | [1]              |
| <b>Herba<br/>Potentillae<br/>Discoloris</b> | <i>Potentilla discolor</i><br>Bunge | 7 CMM from 2 locality, 1 plant specimen, 1 NIFDC reference                                                                   | CACGTCGTTGCCCCTCCCAACCC<br>CTCCGGGAGTTGGGTGGGACGG<br>ATGATGGCCTCCCGTGCCTCCG<br>TCGCGCGGTTGGCATAAATAACA<br>AGTCCTCGGCGGCCAACGCCG<br>GACAATCGGTGGTTGTCAAACC                                                                                              | 210                  | 3 sites:<br>C37G, G93T, T163C                                                                                                                                                                       | [1]              |

|                              |                                                     |                                                                                                                       |                                                                                                                                                                                                                                                            |     |                                                                                  |       |
|------------------------------|-----------------------------------------------------|-----------------------------------------------------------------------------------------------------------------------|------------------------------------------------------------------------------------------------------------------------------------------------------------------------------------------------------------------------------------------------------------|-----|----------------------------------------------------------------------------------|-------|
|                              |                                                     | material, 2<br>counterchecki<br>ng specimens                                                                          | TCGGTGTCTGTGTCGCGTGCGAG<br>TCGTCCGGGGCTTTTCCAATCTG<br>ATGCGCGTCGATTCTGTCGGCGCT<br>TTCAACG                                                                                                                                                                  |     |                                                                                  |       |
| -                            | <i>Potentilla<br/>kleiniana</i><br>Wight et<br>Arn. | Plant<br>specimens                                                                                                    | CACGTCGTTGCCCCCTCCCAACCC<br>CTTCGGGAGTTGGCTGGGACGG<br>ATGGTGGCCTCCCGTGTGCTCCG<br>TCGCGCGGTTGGCATAAATAACA<br>AGTCCTCGGCGGCCAACGCCGC<br>GACAATCGGTGGTTGTCAAACC<br>TCGGTGTCTGTGTCGCGCGCGCG<br>TCGTCCGGGGCTTTTTTTCAATC<br>TAACGCGCGTCGCTCCGTCGAC<br>GCTTTCAACG | 212 | -                                                                                | [1]   |
| <b>Radix<br/>Pulsatillae</b> | <i>Pulsatilla<br/>chinensis</i><br>(Bge.)<br>Regel  | 13 CMM<br>collected from<br>4 locality, 14<br>plant specimen<br>collected from<br>3 locality, 1<br>NIFDC<br>reference | CACACAGCGTCGCCCCACCAA<br>AGCATTTGGATGGGGGCGGAAA<br>TTGGCCCCCGAGCCCCCGGG<br>CACGGTCGGCACAAATGTTGGC<br>CCTCGGCGGCGAGCGTCGCGGT<br>CAGCGGTGGTTGTACTCTCATCC<br>TCCAAAGACAAAATGACGCGTC<br>CGCCTCGTCGCCCCGCTGGGCGA                                                | 219 | 8 sites:<br>C17T, C61T, C63T, C112T,<br>C126G, G170A, G193T,<br>A201T, in/del 64 | [1,2] |

|                                          |                                                                |                                                                            |                                                                                                                                                                                                                                                         |     |   |     |
|------------------------------------------|----------------------------------------------------------------|----------------------------------------------------------------------------|---------------------------------------------------------------------------------------------------------------------------------------------------------------------------------------------------------------------------------------------------------|-----|---|-----|
|                                          |                                                                | material, 2<br>counterchecki<br>ng specimens,<br>Accession no.<br>GU732650 | AGATGACCCAAGGAGTCTCCCC<br>AACCGGAGACTTCCACCTG                                                                                                                                                                                                           |     |   |     |
| <b>Radix<br/>Pulsatillae<br/>Cernuae</b> | <i>Pulsatilla<br/>cernua</i><br>(Thunb.)<br>Bercht.et<br>Opiz. | Accession<br>JN811070 &<br>HQ829820                                        | ACAGCGTCGCCCCACCAAAGC<br>ATTGGATGGGGGCGGAAATTG<br>GCCCCCGAGCCCCCGGGGCA<br>CGGTCGGCACAAATGTTGGCCC<br>TCGGCGGCGAGCGTCGCGGTTA<br>GCGGTGGTTGTACTCTCATCCTC<br>CAAAGACAAAATGACGCGTCCG<br>CCTCGTCGCCCCTGGGCAAAG<br>ATGACCCAAGGAGTCTCCCCTA<br>CCGGAGACTTCCACCTG | 216 | - | [1] |
| -                                        | <i>Pulsatilla<br/>turczanino<br/>vii Kryl. Et<br/>Serg.</i>    | Accession<br>GU732649                                                      | CACACAGCGTCGCCCCACCAA<br>AGCATTTGGATGAGGGCGGAAA<br>TTGGCCCCCGAGCCCTCCGGG<br>GCACGGTCGGCACAAATGTTGG<br>CCCTCGGCGGCGAGCGTCGCGG<br>TCAGCGGTGGTTGTACTCTCATC<br>CTCCAAAGACAAAATGACGCGT                                                                       | 219 | - | [1] |

|                           |                                                  |                                                                                                                                                                                   |                                                                                                                                                                                                                                                                       |     |                                                 |       |
|---------------------------|--------------------------------------------------|-----------------------------------------------------------------------------------------------------------------------------------------------------------------------------------|-----------------------------------------------------------------------------------------------------------------------------------------------------------------------------------------------------------------------------------------------------------------------|-----|-------------------------------------------------|-------|
|                           |                                                  |                                                                                                                                                                                   | CCGCCTCGTCGCCCCGCTGGGCG<br>AAGATGACCCAAGGAGTCTCCC<br>CTACCGGAGACTTCCACCTG                                                                                                                                                                                             |     |                                                 |       |
| <b>Radix<br/>Arnebiae</b> | <i>Arnebia<br/>euchroma</i><br>(Royle)<br>Johnst | 11 CMM<br>collected from<br>6 locality, 1<br>plant<br>specimen, 1<br>NIFDC<br>reference<br>material, 1<br>counterchecki<br>ng specimen,<br>Accession no.<br>EF199848,<br>EF199860 | CACATCGCGTCACCCCATCCAAA<br>ATAATGTTGGATGTGGTGGATTG<br>TGACCTCCTGTGTCTTGAGATGC<br>AGTTGGTCGAAATTCGAGTCCG<br>GAGCTTAGGACTTCACGACAAG<br>TGGTGGTTGGATAACAACCTCGC<br>GTCATGTCGTGTGCCAAGCCTCC<br>GTGTCTCCGTAGACCCTAAGGC<br>GCGTGCTTTCCAACCTCGTTCGTT<br>GGGAAACCGTGCTACGACCG | 223 | 5 sites:<br>A27C, A109G, C143T,<br>G153A, T189C | [1]   |
| <b>Radix<br/>Arnebiae</b> | <i>Arnebia<br/>guttata</i><br>Bunge              | Accession<br>JX976805                                                                                                                                                             | CGCATCGCGTCACCCCATCCCAT<br>GTAACATGGATGTGGTGGATTG<br>TGACCTCCTGTGTCTTGAGATGC<br>AGTTGGTCAAAATTTGAGTCTG<br>GAGCTGAGGACTTCACGTCAAG<br>TGGTGGTTGGATAACAACCTCGC                                                                                                           | 221 | -                                               | [1,3] |

|                                   |                                                                  |                    |                                                                                                                                                                                                                                                                       |     |   |     |
|-----------------------------------|------------------------------------------------------------------|--------------------|-----------------------------------------------------------------------------------------------------------------------------------------------------------------------------------------------------------------------------------------------------------------------|-----|---|-----|
|                                   |                                                                  |                    | GTCCTGTCGTGTGCCAAACCTCC<br>ATTCCTCTGTGGACCCTAAGGCG<br>TGTTTTTTTCCAACCTCTGTGTT<br>GGGAAATCTTGCTACGA                                                                                                                                                                    |     |   |     |
| <b>Radix<br/>Lithosper<br/>mi</b> | <i>Lithosper<br/>mum<br/>erythrorhiz<br/>on</i> Sieb. Et<br>Zucc | Plant<br>specimens | CGCATCGCGTCACCCATCCCCAA<br>CTCTCGTGGATGTGGTGGATTGT<br>GACCTCCTGTGCCTTGCGGTGC<br>AGTTGGTCGAAATTCGAGTTCG<br>GAGTTAAGGACTTCACGACAAG<br>TGGTGGTTGGACGACCAACTCG<br>CGTCATGTCGTGTGCCAAACCTT<br>CGTGGCTCTCAAGACCCTAAGG<br>CACGTGCTACCCGACTCTTGGGT<br>CGGAAAACCTCGTGCTACGACCG | 224 | - | [1] |

## References

1. Chen, S.L. *Standard DNA barcodes of Chinese Materia Medica in Chinese Pharmacopoeia*, 1st ed.; China Science Publishing & Media Ltd.: Beijing, China, 2015; pp. 168, 287, 446, 492.
2. Xie, L.; Wen, J.; Li, L.Q. Phylogenetic analyses of *Clematis* (Ranunculaceae) based on sequences of nuclear ribosomal ITS and three plastid regions. *Syst. Bot.* **2011**, *36*, 907–921.
3. Huang, J.F.; Zhang, M.L.; Cohen, J.I. Phylogenetic analysis of *Lappula Moench* (Boraginaceae) based on molecular and morphological data. *Plant. Syst. Evol.* **2013**, *299*, 913–926.
